# Supplementary material for: Dopant induced diameter tuning of Mn-doped CdTe nanorods in aqueous solution
Source: Royal Society of Chemistry journal article supplement (doi:10.1039/c2ce26616d), 2012-11-01
Supplement: c2ce26616d.pdf [file c2ce26616d.pdf]

## Supporting Information

# Dopant Induced Diameter Tuning of Mn-Doped CdTe Nanorods in Aqueous Solution

**Parthiban Ramasamy,<sup>a</sup> Shariful I. Mamun,<sup>a</sup> Joonkyung Jang<sup>b</sup> and Jinkwon Kim\*<sup>a</sup>**

<sup>a</sup>*Department of Chemistry and GETRC, Kongju National University, 182, Shinkwondong, Kongju, 314-701, Chungnam-do, Republic of Korea.*

<sup>b</sup>*Department of Nanomaterials Engineering, Pusan National University, Miryang 627-70, Republic of Korea.*

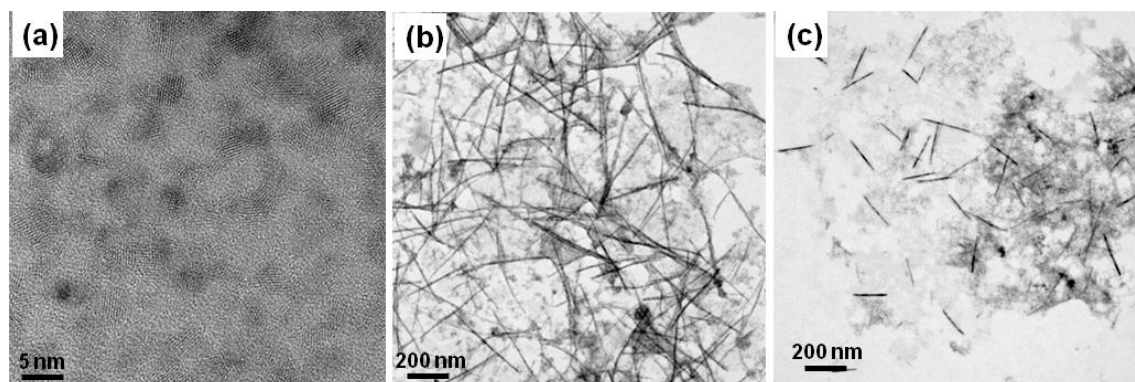

**Fig. S1** Aging conditions comparison of 2.2 % Mn doped CdTe nanocrystals. (a) Nanoparticles retained average size of 3.4 nm after 12 days at 4 °C (b) 455 nm nanowires (average) formed after 4 day at room temperature and (c)  $176 \pm 8$  nm nanorods formed after 8 days (4 days at 4 °C and 4 days at room temperature).

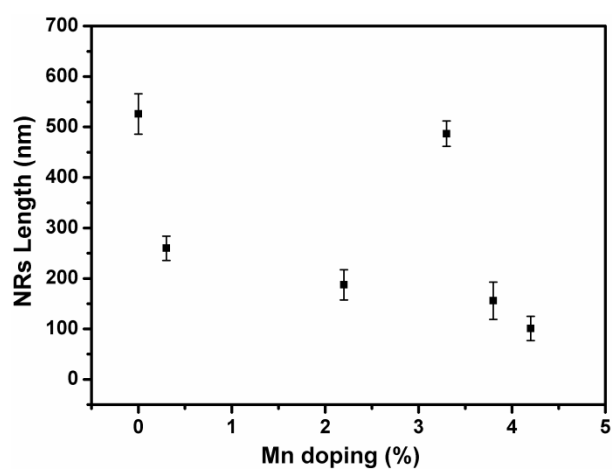

**Fig. S2** Dependences of Mn doped CdTe NRs length. The error bars represent the standard deviation.

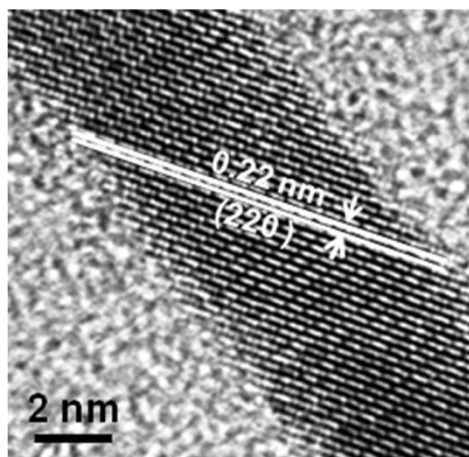

**Fig. S3** HRTEM image of 2.2 % Mn doped CdTe nanorods, the interplanar distance is 0.22 nm, which corresponds to (220) plane of the zinc-blende structure.

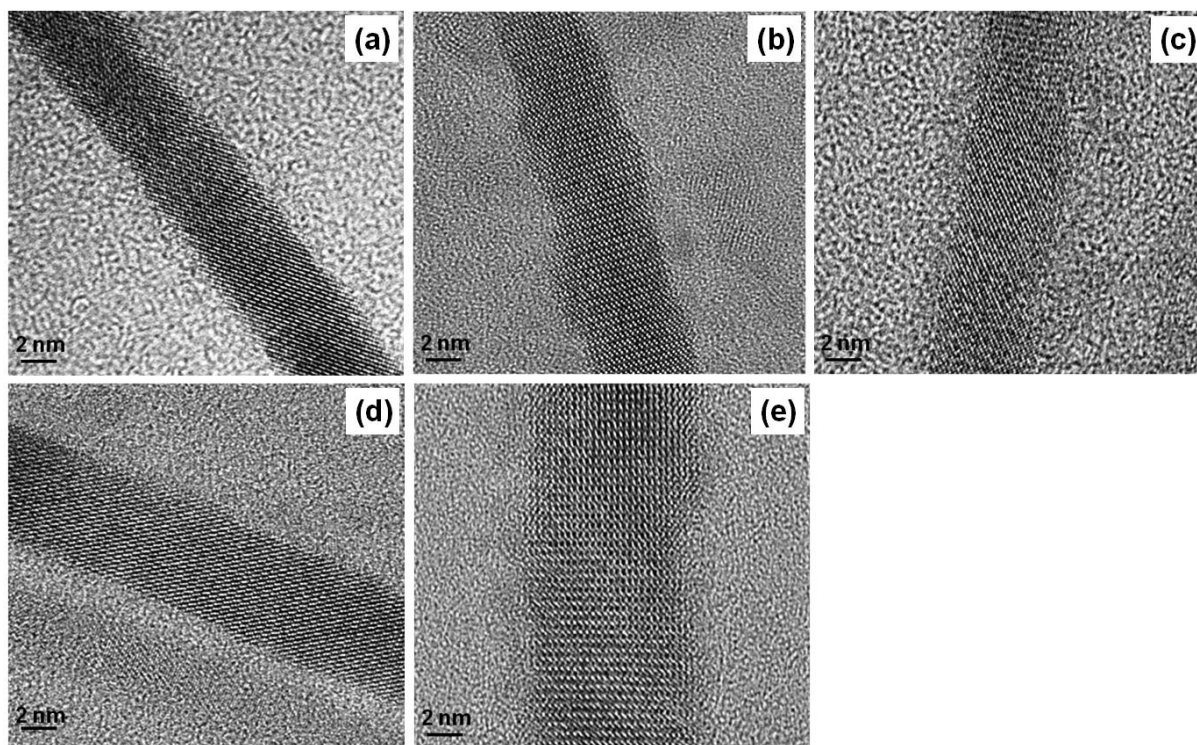

**Fig. S4** HRTEM image of (a) CdTe nanorods (b) 0.3 % (c) 3.3 % (d) 3.8 % and (e) 4.2 % Mn doped CdTe nanorods.

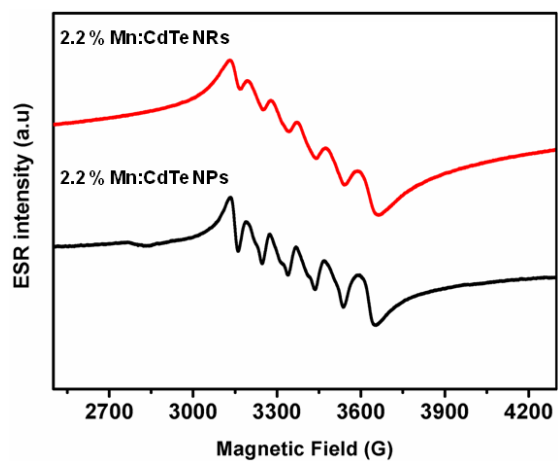

**Fig. S5.** ESR spectra of 1% Mn-doped CdTe (a) nanoparticles and (b) nanorods.

| Nanocrystals  | Zeta potential ( $\zeta$ ) (mV) |
|---------------|---------------------------------|
| CdTe          | - 31.50                         |
| 1% Mn: CdTe   | - 31.66                         |
| 2.5% Mn: CdTe | - 29.80                         |
| 5% Mn: CdTe   | - 35.44                         |
| 7.5% Mn: CdTe | - 30.13                         |
| 10% Mn: CdTe  | - 24.31                         |

**Table S1.** Zeta potential ( $\zeta$ ) values for CdTe and Mn doped CdTe nanocrystals.
